# Supplementary material for: Mitochondrial outer membrane integrity regulates a ubiquitin-dependent and NF-κB-mediated inflammatory response
Source: PubMed Central journal article supplement (PMC10943237; doi:10.1038/s44318-024-00044-1), 2024-02-09
Supplement: 44318_2024_44_MOESM1_ESM.pdf [file 44318_2024_44_MOESM1_ESM.pdf]

## **Table of Contents**

### **Appendix Table S1**

Intramitochondrial localisation of proteins found to be ubiquitylated upon MOMP page 1

Appendix Table S1

| Gene names   | Student's T-test Significant | Localization                       | Source       |
|--------------|------------------------------|------------------------------------|--------------|
| Acad11       | Ubiquitylated upon MOMP      | Inner Mitochondrial Membrane       | Mitocarta3.0 |
| Acot9;Acot10 | Ubiquitylated upon MOMP      | Inner Mitochondrial Membrane       | Mitocarta3.0 |
| Agk          | Ubiquitylated upon MOMP      | Inner Mitochondrial Membrane       | Mitocarta3.0 |
| Agpat5       | Ubiquitylated upon MOMP      | Outer Mitochondrial Membrane       | Mitocarta3.0 |
| Aifm1        | Ubiquitylated upon MOMP      | Inner Mitochondrial Membrane       | Mitocarta3.0 |
| Ak2          | Ubiquitylated upon MOMP      | Mitochondrial Intermembrane Space  | Mitocarta3.0 |
| Akap1        | Ubiquitylated upon MOMP      | Outer Mitochondrial Membrane       | Mitocarta3.0 |
| Apool        | Ubiquitylated upon MOMP      | Inner Mitochondrial Membrane       | Mitocarta3.0 |
| Armc10       | Ubiquitylated upon MOMP      | Outer Mitochondrial Membrane       | Mitocarta3.0 |
| Armcx3       | Ubiquitylated upon MOMP      | Outer Mitochondrial Membrane       | Mitocarta3.0 |
| Atad1        | Ubiquitylated upon MOMP      | Outer Mitochondrial Membrane       | Mitocarta3.0 |
| Atad3        | Ubiquitylated upon MOMP      | Inner Mitochondrial Membrane       | Mitocarta3.0 |
| Atp5b        | Ubiquitylated upon MOMP      | Inner Mitochondrial Membrane       | Mitocarta3.0 |
| Atp5i        | Ubiquitylated upon MOMP      | Inner Mitochondrial Membrane       | Mitocarta3.0 |
| Bak1         | Ubiquitylated upon MOMP      | Outer Mitochondrial Membrane       | Mitocarta3.0 |
| Bax          | Ubiquitylated upon MOMP      | Outer Mitochondrial Membrane       | Mitocarta3.0 |
| Bcl2l1       | Ubiquitylated upon MOMP      | Outer Mitochondrial Membrane       | Mitocarta3.0 |
| Bcl2l13      | Ubiquitylated upon MOMP      | Outer Mitochondrial Membrane       | Mitocarta3.0 |
| Bnip3l       | Ubiquitylated upon MOMP      | Outer Mitochondrial Membrane       | Mitocarta3.0 |
| Card19       | Ubiquitylated upon MOMP      | Unknown mitochondrial localisation | Uniprot      |
| Ccdc127      | Ubiquitylated upon MOMP      | Unknown mitochondrial localisation | Mitocarta3.0 |
| Ccdc51       | Ubiquitylated upon MOMP      | Inner Mitochondrial Membrane       | Mitocarta3.0 |
| Ccdc58       | Ubiquitylated upon MOMP      | Mitochondrial Intermembrane Space  | Mitocarta3.0 |
| Chchd3       | Ubiquitylated upon MOMP      | Inner Mitochondrial Membrane       | Mitocarta3.0 |
| Chchd4       | Ubiquitylated upon MOMP      | Mitochondrial Intermembrane Space  | Mitocarta3.0 |
| Chchd6       | Ubiquitylated upon MOMP      | Inner Mitochondrial Membrane       | Mitocarta3.0 |
| Cisd1        | Ubiquitylated upon MOMP      | Outer Mitochondrial Membrane       | Mitocarta3.0 |
| Coa3         | Ubiquitylated upon MOMP      | Inner Mitochondrial Membrane       | Mitocarta3.0 |
| Comtd1       | Ubiquitylated upon MOMP      | Unknown mitochondrial localisation | Mitocarta3.0 |
| Cox11        | Ubiquitylated upon MOMP      | Inner Mitochondrial Membrane       | Mitocarta3.0 |
| Cox14        | Ubiquitylated upon MOMP      | Inner Mitochondrial Membrane       | Mitocarta3.0 |
| Cox15        | Ubiquitylated upon MOMP      | Inner Mitochondrial Membrane       | Mitocarta3.0 |
| Cox17        | Ubiquitylated upon MOMP      | Mitochondrial Intermembrane Space  | Mitocarta3.0 |
| Cox20        | Ubiquitylated upon MOMP      | Inner Mitochondrial Membrane       | Mitocarta3.0 |
| Cox4i1       | Ubiquitylated upon MOMP      | Inner Mitochondrial Membrane       | Mitocarta3.0 |
| Cox6b1       | Ubiquitylated upon MOMP      | Inner Mitochondrial Membrane       | Mitocarta3.0 |
| Cox6c        | Ubiquitylated upon MOMP      | Inner Mitochondrial Membrane       | Mitocarta3.0 |
| Cox7a2       | Ubiquitylated upon MOMP      | Inner Mitochondrial Membrane       | Mitocarta3.0 |
| Cox7b        | Ubiquitylated upon MOMP      | Inner Mitochondrial Membrane       | Mitocarta3.0 |
| Cpt1a        | Ubiquitylated upon MOMP      | Outer Mitochondrial Membrane       | Mitocarta3.0 |
| Cs           | Ubiquitylated upon MOMP      | Mitochondrial matrix               | Mitocarta3.0 |
| Cyb5b        | Ubiquitylated upon MOMP      | Outer Mitochondrial Membrane       | Mitocarta3.0 |
| Cyb5r1       | Ubiquitylated upon MOMP      | Unknown mitochondrial localisation | Uniprot      |
| Cyb5r3       | Ubiquitylated upon MOMP      | Outer Mitochondrial Membrane       | Mitocarta3.0 |
| Cyc1         | Ubiquitylated upon MOMP      | Inner Mitochondrial Membrane       | Mitocarta3.0 |

|         |                         |                                    |              |
|---------|-------------------------|------------------------------------|--------------|
| Dcakd   | Ubiquitylated upon MOMP | Unknown mitochondrial localisation | Mitocarta3.0 |
| Dhfr    | Ubiquitylated upon MOMP | Unknown mitochondrial localisation | Uniprot      |
| Dhodh   | Ubiquitylated upon MOMP | Inner Mitochondrial Membrane       | Mitocarta3.0 |
| Diablo  | Ubiquitylated upon MOMP | Mitochondrial Intermembrane Space  | Mitocarta3.0 |
| Dlat    | Ubiquitylated upon MOMP | Mitochondrial matrix               | Mitocarta3.0 |
| Dnajc11 | Ubiquitylated upon MOMP | Outer Mitochondrial Membrane       | Mitocarta3.0 |
| Exog    | Ubiquitylated upon MOMP | Inner Mitochondrial Membrane       | Mitocarta3.0 |
| Fam162a | Ubiquitylated upon MOMP | Inner Mitochondrial Membrane       | Mitocarta3.0 |
| Fam73b  | Ubiquitylated upon MOMP | Outer Mitochondrial Membrane       | Mitocarta3.0 |
| Fis1    | Ubiquitylated upon MOMP | Outer Mitochondrial Membrane       | Mitocarta3.0 |
| Fkbp8   | Ubiquitylated upon MOMP | Outer Mitochondrial Membrane       | Mitocarta3.0 |
| Fundc2  | Ubiquitylated upon MOMP | Outer Mitochondrial Membrane       | Mitocarta3.0 |
| Ghitm   | Ubiquitylated upon MOMP | Inner Mitochondrial Membrane       | Mitocarta3.0 |
| Glrx5   | Ubiquitylated upon MOMP | Mitochondrial matrix               | Mitocarta3.0 |
| Glud1   | Ubiquitylated upon MOMP | Mitochondrial matrix               | Mitocarta3.0 |
| Gpam    | Ubiquitylated upon MOMP | Unknown mitochondrial localisation | Mitocarta3.0 |
| Gpd2    | Ubiquitylated upon MOMP | Inner Mitochondrial Membrane       | Mitocarta3.0 |
| Gramd4  | Ubiquitylated upon MOMP | Unknown mitochondrial localisation | Uniprot      |
| Gsr     | Ubiquitylated upon MOMP | Mitochondrial matrix               | Mitocarta3.0 |
| Hccs    | Ubiquitylated upon MOMP | Mitochondrial Intermembrane Space  | Mitocarta3.0 |
| Hk1     | Ubiquitylated upon MOMP | Unknown mitochondrial localisation | Uniprot      |
| Hk2     | Ubiquitylated upon MOMP | Unknown mitochondrial localisation | Uniprot      |
| Hsdl1   | Ubiquitylated upon MOMP | Unknown mitochondrial localisation | Mitocarta3.0 |
| Hspd1   | Ubiquitylated upon MOMP | Unknown mitochondrial localisation | Mitocarta3.0 |
| Htra2   | Ubiquitylated upon MOMP | Inner Mitochondrial Membrane       | Mitocarta3.0 |
| Immt    | Ubiquitylated upon MOMP | Inner Mitochondrial Membrane       | Mitocarta3.0 |
| Letm1   | Ubiquitylated upon MOMP | Inner Mitochondrial Membrane       | Mitocarta3.0 |
| Maoa    | Ubiquitylated upon MOMP | Outer Mitochondrial Membrane       | Mitocarta3.0 |
| Marc2   | Ubiquitylated upon MOMP | Outer Mitochondrial Membrane       | Mitocarta3.0 |
| March5  | Ubiquitylated upon MOMP | Outer Mitochondrial Membrane       | Mitocarta3.0 |
| Mavs    | Ubiquitylated upon MOMP | Outer Mitochondrial Membrane       | Mitocarta3.0 |
| Mcl1    | Ubiquitylated upon MOMP | Outer Mitochondrial Membrane       | Mitocarta3.0 |
| Mdh2    | Ubiquitylated upon MOMP | Mitochondrial matrix               | Mitocarta3.0 |
| Mff     | Ubiquitylated upon MOMP | Outer Mitochondrial Membrane       | Mitocarta3.0 |
| Mfn1    | Ubiquitylated upon MOMP | Outer Mitochondrial Membrane       | Mitocarta3.0 |
| Mfn2    | Ubiquitylated upon MOMP | Outer Mitochondrial Membrane       | Mitocarta3.0 |
| Mgst1   | Ubiquitylated upon MOMP | Unknown mitochondrial localisation | Mitocarta3.0 |
| Micu1   | Ubiquitylated upon MOMP | Inner Mitochondrial Membrane       | Mitocarta3.0 |
| Micu2   | Ubiquitylated upon MOMP | Inner Mitochondrial Membrane       | Mitocarta3.0 |
| Mp68    | Ubiquitylated upon MOMP | Inner Mitochondrial Membrane       | Mitocarta3.0 |
| Mpc1    | Ubiquitylated upon MOMP | Inner Mitochondrial Membrane       | Mitocarta3.0 |
| Mtch1   | Ubiquitylated upon MOMP | Outer Mitochondrial Membrane       | Mitocarta3.0 |
| Mtch2   | Ubiquitylated upon MOMP | Outer Mitochondrial Membrane       | Mitocarta3.0 |
| Mtco2   | Ubiquitylated upon MOMP | Unknown mitochondrial localisation | Uniprot      |
| Mtfr1l  | Ubiquitylated upon MOMP | Unknown mitochondrial localisation | Mitocarta3.0 |
| Mtx1    | Ubiquitylated upon MOMP | Outer Mitochondrial Membrane       | Mitocarta3.0 |
| Mtx2    | Ubiquitylated upon MOMP | Outer Mitochondrial Membrane       | Mitocarta3.0 |
| Mul1    | Ubiquitylated upon MOMP | Outer Mitochondrial Membrane       | Mitocarta3.0 |

|          |                         |                                    |              |
|----------|-------------------------|------------------------------------|--------------|
| Ndufa3   | Ubiquitylated upon MOMP | Inner Mitochondrial Membrane       | Mitocarta3.0 |
| Ndufa4   | Ubiquitylated upon MOMP | Inner Mitochondrial Membrane       | Mitocarta3.0 |
| Ndufa8   | Ubiquitylated upon MOMP | Inner Mitochondrial Membrane       | Mitocarta3.0 |
| Ndufb1   | Ubiquitylated upon MOMP | Inner Mitochondrial Membrane       | Mitocarta3.0 |
| Ndufb10  | Ubiquitylated upon MOMP | Inner Mitochondrial Membrane       | Mitocarta3.0 |
| Ndufb5   | Ubiquitylated upon MOMP | Inner Mitochondrial Membrane       | Mitocarta3.0 |
| Ndufc2   | Ubiquitylated upon MOMP | Inner Mitochondrial Membrane       | Mitocarta3.0 |
| Ndufs5   | Ubiquitylated upon MOMP | Inner Mitochondrial Membrane       | Mitocarta3.0 |
| Ociad1   | Ubiquitylated upon MOMP | Outer Mitochondrial Membrane       | Mitocarta3.0 |
| Parl     | Ubiquitylated upon MOMP | Inner Mitochondrial Membrane       | Mitocarta3.0 |
| Pet117   | Ubiquitylated upon MOMP | Inner Mitochondrial Membrane       | Mitocarta3.0 |
| Pgam5    | Ubiquitylated upon MOMP | Outer Mitochondrial Membrane       | Mitocarta3.0 |
| Phb      | Ubiquitylated upon MOMP | Inner Mitochondrial Membrane       | Mitocarta3.0 |
| Phb2     | Ubiquitylated upon MOMP | Inner Mitochondrial Membrane       | Mitocarta3.0 |
| Plgrkt   | Ubiquitylated upon MOMP | Unknown mitochondrial localisation | Mitocarta3.0 |
| Ppif     | Ubiquitylated upon MOMP | Mitochondrial matrix               | Mitocarta3.0 |
| Prdx3    | Ubiquitylated upon MOMP | Mitochondrial matrix               | Mitocarta3.0 |
| Ptges2   | Ubiquitylated upon MOMP | Inner Mitochondrial Membrane       | Mitocarta3.0 |
| Pthr2    | Ubiquitylated upon MOMP | Outer Mitochondrial Membrane       | Mitocarta3.0 |
| Rdh13    | Ubiquitylated upon MOMP | Inner Mitochondrial Membrane       | Mitocarta3.0 |
| Rhot1    | Ubiquitylated upon MOMP | Outer Mitochondrial Membrane       | Mitocarta3.0 |
| Rhot2    | Ubiquitylated upon MOMP | Outer Mitochondrial Membrane       | Mitocarta3.0 |
| Samm50   | Ubiquitylated upon MOMP | Outer Mitochondrial Membrane       | Mitocarta3.0 |
| Sco1     | Ubiquitylated upon MOMP | Inner Mitochondrial Membrane       | Mitocarta3.0 |
| Scp2     | Ubiquitylated upon MOMP | Inner Mitochondrial Membrane       | Mitocarta3.0 |
| Sdha     | Ubiquitylated upon MOMP | Inner Mitochondrial Membrane       | Mitocarta3.0 |
| Sfxn1    | Ubiquitylated upon MOMP | Inner Mitochondrial Membrane       | Mitocarta3.0 |
| Sfxn2    | Ubiquitylated upon MOMP | Inner Mitochondrial Membrane       | Mitocarta3.0 |
| Shmt2    | Ubiquitylated upon MOMP | Mitochondrial matrix               | Mitocarta3.0 |
| Slc25a10 | Ubiquitylated upon MOMP | Inner Mitochondrial Membrane       | Mitocarta3.0 |
| Slc25a12 | Ubiquitylated upon MOMP | Inner Mitochondrial Membrane       | Mitocarta3.0 |
| Slc25a13 | Ubiquitylated upon MOMP | Inner Mitochondrial Membrane       | Mitocarta3.0 |
| Slc25a20 | Ubiquitylated upon MOMP | Inner Mitochondrial Membrane       | Mitocarta3.0 |
| Slc25a22 | Ubiquitylated upon MOMP | Inner Mitochondrial Membrane       | Mitocarta3.0 |
| Slc25a24 | Ubiquitylated upon MOMP | Inner Mitochondrial Membrane       | Mitocarta3.0 |
| Slc25a25 | Ubiquitylated upon MOMP | Inner Mitochondrial Membrane       | Mitocarta3.0 |
| Slc25a3  | Ubiquitylated upon MOMP | Inner Mitochondrial Membrane       | Mitocarta3.0 |
| Slc25a4  | Ubiquitylated upon MOMP | Inner Mitochondrial Membrane       | Mitocarta3.0 |
| Slc25a40 | Ubiquitylated upon MOMP | Inner Mitochondrial Membrane       | Mitocarta3.0 |
| Slc25a46 | Ubiquitylated upon MOMP | Outer Mitochondrial Membrane       | Mitocarta3.0 |
| Slc25a5  | Ubiquitylated upon MOMP | Inner Mitochondrial Membrane       | Mitocarta3.0 |
| Smim37   | Ubiquitylated upon MOMP | Unknown mitochondrial localisation | Uniprot      |
| Stmp1    | Ubiquitylated upon MOMP | Unknown mitochondrial localisation | Uniprot      |
| Surf1    | Ubiquitylated upon MOMP | Inner Mitochondrial Membrane       | Mitocarta3.0 |
| Synj2bp  | Ubiquitylated upon MOMP | Outer Mitochondrial Membrane       | Mitocarta3.0 |
| Tdrkh    | Ubiquitylated upon MOMP | Unknown mitochondrial localisation | Mitocarta3.0 |
| TIMM10   | Ubiquitylated upon MOMP | Inner Mitochondrial Membrane       | Mitocarta3.0 |
| TIMM13   | Ubiquitylated upon MOMP | Inner Mitochondrial Membrane       | Mitocarta3.0 |

|          |                         |                                    |              |
|----------|-------------------------|------------------------------------|--------------|
| TIMM21   | Ubiquitylated upon MOMP | Inner Mitochondrial Membrane       | Mitocarta3.0 |
| TIMM22   | Ubiquitylated upon MOMP | Inner Mitochondrial Membrane       | Mitocarta3.0 |
| TIMM23   | Ubiquitylated upon MOMP | Inner Mitochondrial Membrane       | Mitocarta3.0 |
| TIMM50   | Ubiquitylated upon MOMP | Inner Mitochondrial Membrane       | Mitocarta3.0 |
| TIMM8a1  | Ubiquitylated upon MOMP | Inner Mitochondrial Membrane       | Mitocarta3.0 |
| TIMM8b   | Ubiquitylated upon MOMP | Inner Mitochondrial Membrane       | Mitocarta3.0 |
| TIMM9    | Ubiquitylated upon MOMP | Inner Mitochondrial Membrane       | Mitocarta3.0 |
| Tmem126a | Ubiquitylated upon MOMP | Inner Mitochondrial Membrane       | Mitocarta3.0 |
| Tmem14c  | Ubiquitylated upon MOMP | Inner Mitochondrial Membrane       | Mitocarta3.0 |
| TOMM20   | Ubiquitylated upon MOMP | Outer Mitochondrial Membrane       | Mitocarta3.0 |
| TOMM22   | Ubiquitylated upon MOMP | Outer Mitochondrial Membrane       | Mitocarta3.0 |
| TOMM40   | Ubiquitylated upon MOMP | Outer Mitochondrial Membrane       | Mitocarta3.0 |
| TOMM5    | Ubiquitylated upon MOMP | Outer Mitochondrial Membrane       | Mitocarta3.0 |
| TOMM7    | Ubiquitylated upon MOMP | Outer Mitochondrial Membrane       | Mitocarta3.0 |
| TOMM70a  | Ubiquitylated upon MOMP | Outer Mitochondrial Membrane       | Mitocarta3.0 |
| Trabd    | Ubiquitylated upon MOMP | Unknown mitochondrial localisation | Proteinatlas |
| Tspo     | Ubiquitylated upon MOMP | Outer Mitochondrial Membrane       | Mitocarta3.0 |
| Uqcc3    | Ubiquitylated upon MOMP | Inner Mitochondrial Membrane       | Mitocarta3.0 |
| Uqcrc2   | Ubiquitylated upon MOMP | Inner Mitochondrial Membrane       | Mitocarta3.0 |
| Uqcrfs1  | Ubiquitylated upon MOMP | Inner Mitochondrial Membrane       | Mitocarta3.0 |
| Uqcrh    | Ubiquitylated upon MOMP | Inner Mitochondrial Membrane       | Mitocarta3.0 |
| Uqcrq    | Ubiquitylated upon MOMP | Inner Mitochondrial Membrane       | Mitocarta3.0 |
| Usp30    | Ubiquitylated upon MOMP | Outer Mitochondrial Membrane       | Mitocarta3.0 |
| Vdac1    | Ubiquitylated upon MOMP | Outer Mitochondrial Membrane       | Mitocarta3.0 |
| Vdac2    | Ubiquitylated upon MOMP | Outer Mitochondrial Membrane       | Mitocarta3.0 |
| Vdac3    | Ubiquitylated upon MOMP | Outer Mitochondrial Membrane       | Mitocarta3.0 |
| Xrcc6bp1 | Ubiquitylated upon MOMP | Mitochondrial Intermembrane Space  | Mitocarta3.0 |
| Yme111   | Ubiquitylated upon MOMP | Inner Mitochondrial Membrane       | Mitocarta3.0 |
